# Supplementary material for: Are patients accurate forecasters of their emotional response to medical conditions? A scoping review on affective forecasting
Source: HighWire-hosted journal article supplement (doi:10.1136/bmjopen-2021-053370), 2021-12-01
Supplement: bmjopen-2021-053370supp001_data_supplement.pdf [file bmjopen-2021-053370supp001_data_supplement.pdf]

**Appendix 1.1 Search strategy in PubMed (2021 April 12<sup>th</sup>)**

| #  | Query                                                                                            | Results   |
|----|--------------------------------------------------------------------------------------------------|-----------|
| #6 | #1 OR #5                                                                                         | 1,856     |
| #5 | #2 AND #3 AND #4                                                                                 | 1,744     |
| #4 | "Clinical Decision-Making"[Mesh] OR "Decision Making"[Mesh] OR "decision making*"[tiab]          | 324,699   |
| #3 | "Emotions"[MeSH] OR emotions[tiab] OR feelings[tiab]                                             | 298,360   |
| #2 | "Forecasting"[Mesh] OR forecasting[tiab] OR predicting[tiab] OR prediction[tiab] OR future[tiab] | 1,336,974 |
| #1 | "affective forecast*"[tiab] OR "impact bias"[tiab]                                               | 135       |

**Appendix 1.2 Embase.com Session Results (2021 April 12<sup>th</sup>)**

| #  | Query                                                                                                                                                                                          | Results   |
|----|------------------------------------------------------------------------------------------------------------------------------------------------------------------------------------------------|-----------|
| #6 | #1 OR #5                                                                                                                                                                                       | 4,035     |
| #5 | #2 AND #3 AND #4                                                                                                                                                                               | 3,911     |
| #4 | 'clinical decision making'/de OR 'decision making'/de OR 'medical decision making'/exp OR 'patient decision making'/exp OR 'shared decision making'/exp OR 'decision making':ti,ab,kw          | 463,396   |
| #3 | 'emotion'/exp OR emotions:ti,ab,kw OR feelings:ti,ab,kw                                                                                                                                        | 686,673   |
| #2 | 'prediction and forecasting'/de OR 'forecasting'/exp OR 'prediction'/exp OR 'predictive validity'/exp OR prediction:ti,ab,kw OR predicting:ti,ab,kw OR forecasting:ti,ab,kw OR future:ti,ab,kw | 1,945,306 |

|    |                                                          |     |
|----|----------------------------------------------------------|-----|
| #1 | 'affective forecast*':ti,ab,kw OR 'impact bias':ti,ab,kw | 152 |
|----|----------------------------------------------------------|-----|

#### Appendix 1.3 CINAHL (Ebsco) Session Results (2021 April 12<sup>th</sup>)

| #  | Query                                                                                                                                | Results |
|----|--------------------------------------------------------------------------------------------------------------------------------------|---------|
| S6 | S1 OR S5                                                                                                                             | 906     |
| S5 | S2 AND S3 AND S4                                                                                                                     | 863     |
| S4 | MH "Decision Making, Clinical" OR MH "Decision Making+" OR TI "decision making*" OR AB "decision making"                             | 165,163 |
| S3 | MH "Emotions+" OR TI (emotions OR feelings) OR AB (emotions OR feelings)                                                             | 184,287 |
| S2 | MH "Forecasting" OR TI (forecasting OR predicting OR prediction OR future) OR AB (forecasting OR predicting OR prediction OR future) | 348,464 |
| S1 | TI ("affective forecast*" OR "impact bias") OR AB ("affective forecast*" OR "impact bias")                                           | 51      |

#### Appendix 1.4 Cochrane Library (Wiley) Session Results (2021 April 12<sup>th</sup>)

| #  | Query                                  | Results |
|----|----------------------------------------|---------|
| #6 | #1 or #5                               | 59      |
| #5 | #2 and #3 and #4                       | 48      |
| #4 | (decision NEXT making):ti,ab,kw        | 14,116  |
| #3 | emotions:ti,ab,kw or feelings:ti,ab,kw | 10,820  |

|           |                                                                                       |               |
|-----------|---------------------------------------------------------------------------------------|---------------|
| <b>#2</b> | prediction:ti,ab,kw or predicting:ti,ab,kw or forecasting:ti,ab,kw or future:ti,ab,kw | <b>65,831</b> |
| <b>#1</b> | ((affective NEXT forecast*) or (impact NEXT bias)):ti,ab,kw                           | <b>11</b>     |
